# Supplementary material
Source: publisher site journal article supplement (https://www.dovepress.com/article/546530)
Supplement: Supplementary file 1 [file 546530_ID%20546530%20supplementary%20file.docx]

**Supplementary Material**


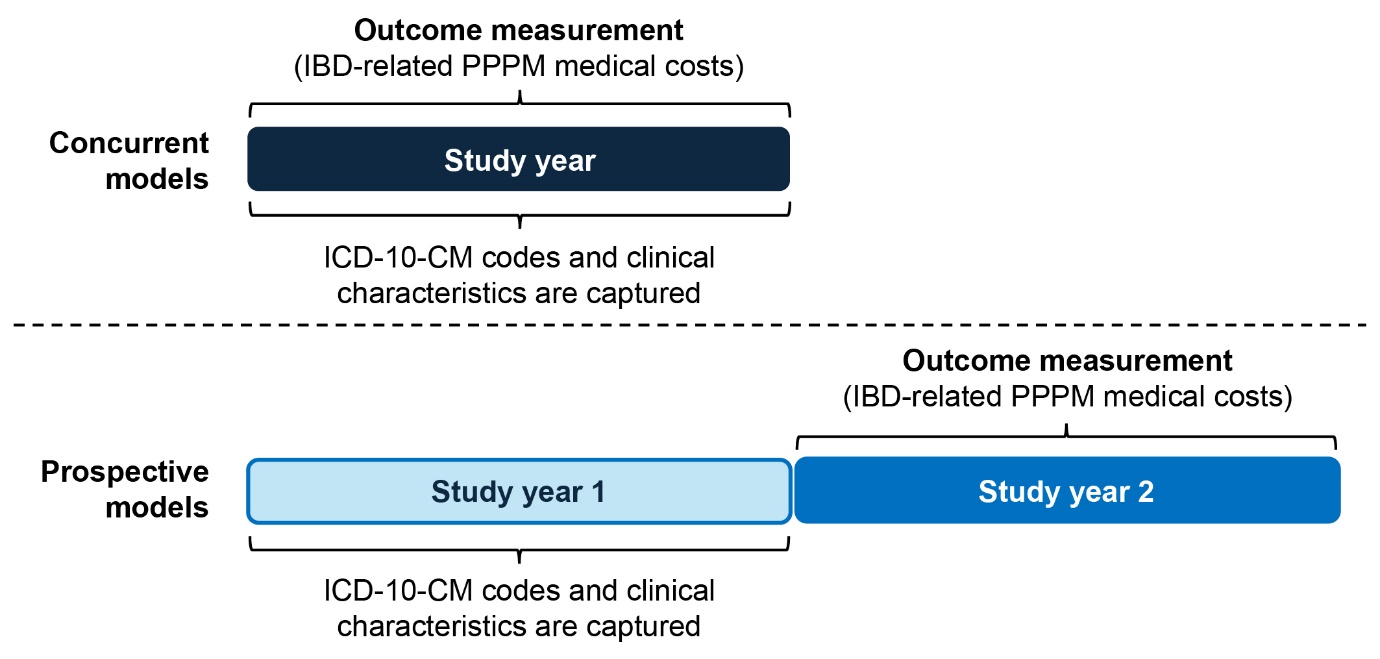
**Supplementary Figure 1** Data collection for concurrent and prospective model development.

**Abbreviations:** IBD, inflammatory bowel disease; ICD-10-CM, International Classification of Diseases, 10th Revision, Clinical Modification; PPPM, per patient per month.

**Supplementary Table 1** Principles of the DCG-HCC Models and Their Application in our IBD-Specific Clinical-Risk Grouper

| Principle1,2 | Application to the IBD-specific clinical-risk grouper |
| --- | --- |
| Principle 1: Diagnostic categories should be clinically meaningful  Each diagnostic category is a set of ICD-9-CM codes. These codes should all relate to a reasonably well-specified disease or medical condition that defines the category. Conditions must be sufficiently clinically specific to minimize opportunities for gaming or discretionary coding. Clinical meaningfulness improves the face validity of the classification system to clinicians, its interpretability, and its utility for disease management and quality monitoring | Our model employed ICD-10-CM codes, which supersede ICD-9-CM codes. Although the categories were primarily formed based on the grouping of ICD-10-CM codes by IBD-related medical costs, the codes specifying each severity group were reviewed for face validity. In the final groupings, the highest severity groups primarily included ICD-10-CM codes associated with extensive disease and the lowest severity groups included codes without complications |
| Principle 2: Diagnostic categories should predict medical expenditures  Diagnoses in the same diagnostic cost group should be reasonably homogeneous with respect to their effect on both current (this year’s) and future (next year’s) costs | This was a core principle used during model development. ICD-10-CM codes with similar mean IBD-related PPPM costs were grouped together using a cluster-based analysis |
| Principle 3: Diagnostic categories that will affect payments should have adequate sample sizes to permit accurate and stable estimates of expenditures  Diagnostic categories used in establishing payments should have adequate sample sizes in available data sets. Given the extreme skewness of medical expenditure data, the data cannot reliably determine the expected cost of extremely rare diagnostic categories | The sample sizes were as follows: CD severity group 1: n = 17,966 in 2020, n = 20,478 in 2021, n = 20,755 in 2022; CD severity group 2: n = 11,633 in 2020, n = 12,709 in 2021, n = 13,253 in 2022; CD severity group 3: n = 5127 in 2020, n = 5641 in 2021, n = 5625 in 2022; UC severity group 1: n = 4882 in 2020, n = 5928 in 2021, n = 6467 in 2022; UC severity group 2: n = 28,389 in 2020, n = 32,874 in 2021, n = 33,707 in 2022; UC severity group 3: n = 6527 in 2020, n = 7440 in 2021, n = 7803 in 2022 |
| **4.** Principle 4: In creating an individual’s clinical profile, hierarchies should be used to characterize the person’s illness level within each disease process, while the effects of unrelated disease processes accumulate  Because each new medical problem adds to an individual’s total disease burden, unrelated disease processes should increase predicted costs of care. However, the most severe manifestation of a given disease process principally defines its impact on costs. Therefore, related conditions should be treated hierarchically, with more severe manifestations of a condition dominating (and zeroing out the effect of) less serious ones | In applying the clinical grouper, patients were assigned to the highest severity group eligible based on their coding. Patients having both CD and UC (indeterminate colitis) would belong to a severity group for each condition |
| Principle 5: The diagnostic classification should encourage specific coding  Vague diagnostic codes should be grouped with less severe and lower-paying diagnostic categories to provide incentives for more specific diagnostic coding | N/A. Every ICD-10-CM code for CD and UC was assigned to a group. No codes were consolidated on similarity or deemed too vague for inclusion |
| Principle 6: The diagnostic classification should not reward coding proliferation  The classification should not measure greater disease burden simply because more ICD-9-CM codes are present. Hence, neither the number of times that a particular code appears, nor the presence of additional, closely related codes that all indicate the same condition should increase predicted costs | Each ICD-10-CM code contributes only once to the grouper. Having multiple instances of the same code did not affect group assignment |
| Principle 7: Providers should not be penalized for recording additional diagnoses (monotonicity)This principle has 2 consequences for modeling: (1) no condition category should carry a negative payment weight, and (2) a condition that is higher-ranked in a disease hierarchy (causing lower-rank diagnoses to be ignored) should have at least as large a payment weight as lower-ranked conditions in the same hierarchy | Although we aimed to follow this principle, we do have models with predictors that have negative weights. We allowed this because there are other applications of this model beyond payment models. Should this model be employed for payment, then negative weights in the model could have undesirable consequences |
| Principle 8: The classification system should be internally consistent (transitive)  If diagnostic category A is higher-ranked than category B in a disease hierarchy, and category B is higher-ranked than category C, then category A should be higher ranked than category C. Transitivity improves the internal consistency of the classification system, and ensures that the assignment of diagnostic categories is independent of the order in which hierarchical exclusion rules are applied | In our case, severity group 1 was the lowest ranking cost and disease severity, and severity group 3 was the highest ranking |
| Principle 9: The diagnostic classification should assign all ICD-9-CM codes (exhaustive classification)  Since each diagnostic code potentially contains relevant clinical information, the classification should categorize all ICD-9-CM codes | All CD- and UC-related ICD-10-CM codes were  included in the models |
| **10.** Principle 10: Discretionary diagnostic categories should be excluded from prospective payment models  Diagnoses that are particularly subject to intentional or unintentional discretionary coding variation or inappropriate coding by health plans/providers, or that are not clinically or empirically credible as cost predictors, should not increase cost predictions. Excluding these diagnoses reduces the sensitivity of the model to coding variation, coding proliferation, gaming, and upcoding | N/A. No IBD diagnosis codes were deemed too vague or insignificant for inclusion |

**Abbreviations:** CD, Crohn’s disease; DCG-HCC, Diagnostic Cost Group Hierarchical Condition Category; IBD, inflammatory bowel disease; ICD-9-CM, International Classification of Diseases, 9th Revision, Clinical Modification; ICD-10-CM, International Classification of Diseases, 10th Revision, Clinical Modification; N/A, not applicable; UC, ulcerative colitis.

**Supplementary Table 2** Rules Used to Assign ICD-10-CM Codes to CD and UC Severity Groups Following Cluster-Based Analysis of Costs

| Severity group | Rule for designating ICD-10-CM code to severity groups |
| --- | --- |
| CD |  |
| Severity group 1 | PPPM medical costs were < 100% of the overall mean CD costs |
| Severity group 2 | PPPM medical costs were 100–125% of the overall mean CD costs |
| Severity group 3 | PPPM medical costs were > 125% of the overall mean CD costs |
| UC |  |
| Severity group 1 | PPPM medical costs were < 75% of the overall mean UC costs |
| Severity group 2 | PPPM medical costs were 75–125% of the overall mean UC costs |
| Severity group 3 | PPPM medical costs were > 125% of the overall mean UC costs |

**Abbreviations:** CD, Crohn’s disease; ICD-10-CM, International Classification of Diseases, 10th Revision, Clinical Modification; PPPM, per patient per month; UC, ulcerative colitis.

**Supplementary Table 3** Mean and Relative PPPM Costs for all CD and UC Diagnosis Codes by Severity Group

| Diagnosis codes | Description | Mean cost  PPPM | Relative  cost |
| --- | --- | --- | --- |
| CD severity group 1 | | | |
| K5010 | Crohn's disease of large intestine without complications | $896 | 84% |
| K50911 | Crohn's disease, unspecified, with rectal bleeding | $934 | 87% |
| K5090 | Crohn's disease, unspecified, without complications | $935 | 88% |
| K5000 | Crohn's disease of small intestine without complications | $944 | 88% |
| K50011 | Crohn's disease of small intestine with rectal bleeding | $1008 | 94% |
| K50919 | Crohn's disease, unspecified, with unspecified complications | $1011 | 95% |
| K50019 | Crohn's disease of small intestine with unspecified complications | $1038 | 97% |
| K50119 | Crohn's disease of large intestine with unspecified complications | $1046 | 98% |
| CD severity group 2 | | | |
| K50118 | Crohn's disease of large intestine with other complication | $1089 | 102% |
| K50111 | Crohn's disease of large intestine with rectal bleeding | $1125 | 105% |
| K50918 | Crohn's disease, unspecified, with other complication | $1137 | 106% |
| K50112 | Crohn's disease of large intestine with intestinal obstruction | $1171 | 110% |
| K50018 | Crohn's disease of small intestine with other complication | $1176 | 110% |
| K50819 | Crohn's disease of both small and large intestine with unspecified complications | $1223 | 115% |
| K5080 | Crohn's disease of both small and large intestine without complications | $1230 | 115% |
| K50012 | Crohn's disease of small intestine with intestinal obstruction | $1271 | 119% |
| K50818 | Crohn's disease of both small and large intestine with other complication | $1330 | 125% |
| K50912 | Crohn's disease, unspecified, with intestinal obstruction | $1415 | 133% |
| CD severity group 3 | | | |
| K50811 | Crohn's disease of both small and large intestine with rectal bleeding | $1363 | 128% |
| K50113 | Crohn's disease of large intestine with fistula | $1434 | 134% |
| K50812 | Crohn's disease of both small and large intestine with intestinal obstruction | $1469 | 138% |
| K50913 | Crohn's disease, unspecified, with fistula | $1477 | 138% |
| K50814 | Crohn's disease of both small and large intestine with abscess | $1525 | 143% |
| K50914 | Crohn's disease, unspecified, with abscess | $1537 | 144% |
| K50014 | Crohn's disease of small intestine with abscess | $1541 | 144% |
| K50114 | Crohn's disease of large intestine with abscess | $1585 | 149% |
| K50013 | Crohn's disease of small intestine with fistula | $1622 | 152% |
| K50813 | Crohn's disease of both small and large intestine with fistula | $1654 | 155% |
| UC severity group 1 | | | |
| K5120 | Ulcerative (chronic) proctitis without complications | $131 | 68% |
| K5140 | Inflammatory polyps of colon without complications | $61 | 32% |
| K51411 | Inflammatory polyps of colon with rectal bleeding | $128 | 66% |
| K51412 | Inflammatory polyps of colon with intestinal obstruction | $126 | 65% |
| K51413 | Inflammatory polyps of colon with fistula | $118 | 61% |
| K51418 | Inflammatory polyps of colon with other complication | $84 | 44% |
| K51419 | Inflammatory polyps of colon with unspecified complications | $51 | 26% |
| K51513 | Left sided colitis with fistula | $139 | 72% |
| UC severity group 2 | | | |
| K5100 | Ulcerative (chronic) pancolitis without complications | $229 | 118% |
| K51211 | Ulcerative (chronic) proctitis with rectal bleeding | $183 | 95% |
| K51213 | Ulcerative (chronic) proctitis with fistula | $210 | 109% |
| K51214 | Ulcerative (chronic) proctitis with abscess | $218 | 113% |
| K51218 | Ulcerative (chronic) proctitis with other complication | $208 | 107% |
| K51219 | Ulcerative (chronic) proctitis with unspecified complications | $165 | 85% |
| K5130 | Ulcerative (chronic) rectosigmoiditis without complications | $193 | 99% |
| K51312 | Ulcerative (chronic) rectosigmoiditis with intestinal obstruction | $180 | 93% |
| K51313 | Ulcerative (chronic) rectosigmoiditis with fistula | $241 | 125% |
| K51318 | Ulcerative (chronic) rectosigmoiditis with other complication | $220 | 114% |
| K51319 | Ulcerative (chronic) rectosigmoiditis with unspecified complications | $231 | 119% |
| K51414 | Inflammatory polyps of colon with abscess | $172 | 89% |
| K5150 | Left sided colitis without complications | $203 | 105% |
| K51511 | Left sided colitis with rectal bleeding | $234 | 121% |
| K51512 | Left sided colitis with intestinal obstruction | $194 | 100% |
| K51518 | Left sided colitis with other complication | $212 | 109% |
| K51519 | Left sided colitis with unspecified complications | $187 | 97% |
| K5180 | Other ulcerative colitis without complications | $180 | 93% |
| K51819 | Other ulcerative colitis with unspecified complications | $220 | 114% |
| K5190 | Ulcerative colitis, unspecified, without complications | $182 | 94% |
| K51913 | Ulcerative colitis, unspecified with fistula | $231 | 119% |
| K51914 | Ulcerative colitis, unspecified with abscess | $228 | 118% |
| K51919 | Ulcerative colitis, unspecified with unspecified complications | $219 | 113% |
| UC severity group 3 | | | |
| K51011 | Ulcerative (chronic) pancolitis with rectal bleeding | $353 | 182% |
| K51012 | Ulcerative (chronic) pancolitis with intestinal obstruction | $280 | 145% |
| K51013 | Ulcerative (chronic) pancolitis with fistula | $269 | 139% |
| K51014 | Ulcerative (chronic) pancolitis with abscess | $297 | 153% |
| K51018 | Ulcerative (chronic) pancolitis with other complications | $284 | 147% |
| K51019 | Ulcerative (chronic) pancolitis with unspecified complications | $279 | 144% |
| K51212 | Ulcerative (chronic) proctitis with intestinal obstruction | $261 | 135% |
| K51311 | Ulcerative (chronic) rectosigmoiditis with rectal bleeding | $273 | 141% |
| K51314 | Ulcerative (chronic) rectosigmoiditis with abscess | $353 | 182% |
| K51514 | Left sided colitis with abscess | $280 | 145% |
| K51811 | Other ulcerative colitis with rectal bleeding | $255 | 132% |
| K51812 | Other ulcerative colitis with intestinal obstruction | $273 | 141% |
| K51813 | Other ulcerative colitis with fistula | $308 | 159% |
| K51814 | Other ulcerative colitis with abscess | $300 | 155% |
| K51818 | Other ulcerative colitis with other complication | $246 | 127% |
| K51911 | Ulcerative colitis, unspecified with rectal bleeding | $304 | 157% |
| K51912 | Ulcerative colitis, unspecified with intestinal obstruction | $282 | 146% |
| K51918 | Ulcerative colitis, unspecified with other complication | $248 | 128% |

**Note:** Costs are in US dollars.

**Abbreviations:** CD, Crohn’s disease; PPPM, per patient per month; UC, ulcerative colitis.

**Supplementary Table 4** Example Hierarchical Assignment of Patients to Severity Groups

| Patient | Primary ICD-10-CM codes for medical claims | Associated severity group | Hierarchical assignment |
| --- | --- | --- | --- |
| Patient A | K5120 | UC severity group 1 | UC severity group 3 |
| K51913 | UC severity group 3 |
| Patient B | K5100 | UC severity group 2 | UC severity group 3 |
| K5100 | UC severity group 2 |
| K51013 | UC severity group 3 |
| K5100 | UC severity group 2 |
| Patient C | K5140 | UC severity group 1 | UC severity group 1 |
| Patient D | K50912 | CD severity group 2 | CD severity group 2 |
| K5090 | CD severity group 1 |
| K5120 | UC severity group 1 | UC severity group 1 |
| K5120 | UC severity group 1 |
| Patient E | K50014 | CD severity group 3 | CD severity group 3 |
| K5000 | CD severity group 1 |
| K5000 | CD severity group 1 |

**Notes:** Patients are hierarchically assigned to risk groups within a given study year based on their coded medical claims. Patients are assigned to one severity group for each disease state (CD or UC) and are assigned to the highest severity level based on the observed diagnoses. The presence of multiple claims does not affect group designation.

**Abbreviations:** CD, Crohn’s disease; ICD-10-CM, International Classification of Diseases, 10th Revision, Clinical Modification; UC, ulcerative colitis.
